# Supplementary material
Source: publisher figshare collection journal article supplement (https://tandf.figshare.com/articles/dataset/_/15127988)
Supplement: Supplementary file 1 [file 1]

# Defining HTN by BP $\geq$ sBP/105 or (self-reported HTN and medic)

normal FLI, HTN

FLD, no HTN

FLD, HTN

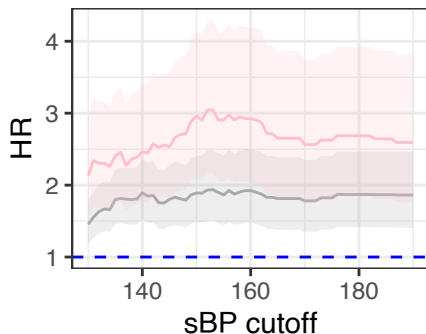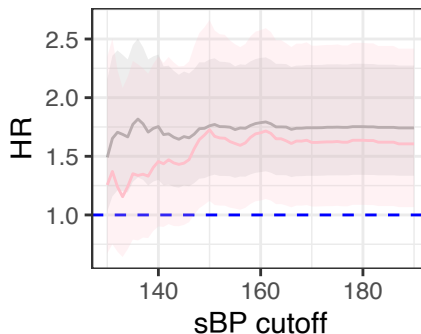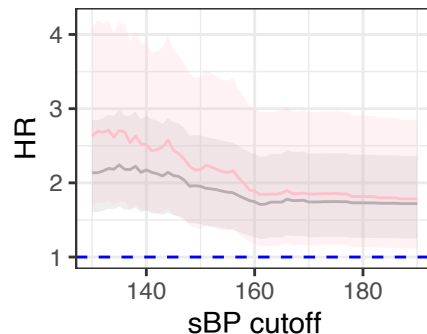

RERI

RERI

Multip. interaction

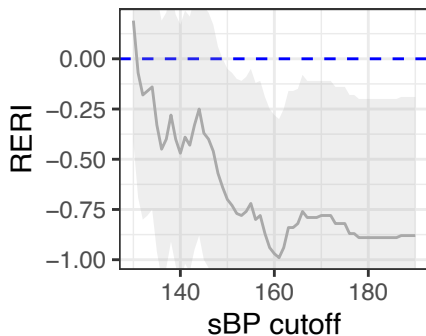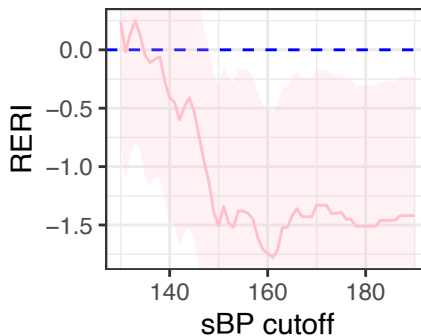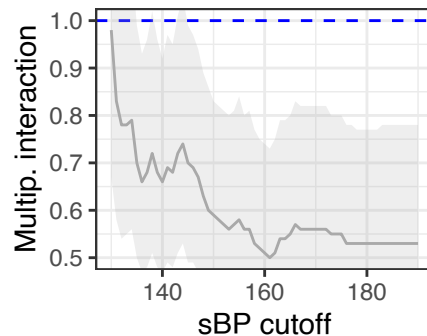

Multip. interaction

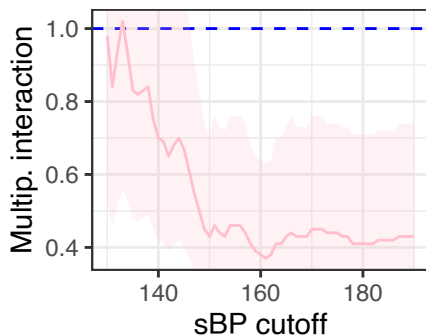

HTN, hypertension  
BP, blood pressure  
HR, hazard ratio in comparison to normal FLI, no hypertension category in the fully-adjusted Cox regression models  
sBP, mean systolic blood pressure at baseline

Outcome — all-cause — CV mortality

# Defining HTN by BP $\geq 160$ /dBP or (self-reported HTN and medic)

normal FLI, HTN

FLD, no HTN

FLD, HTN

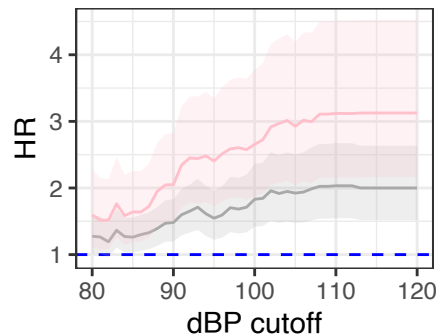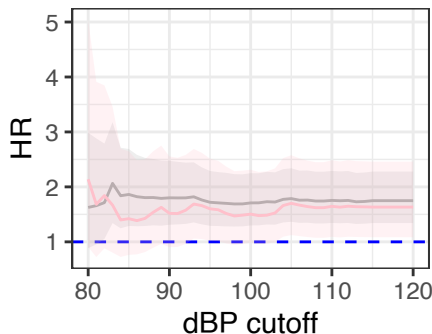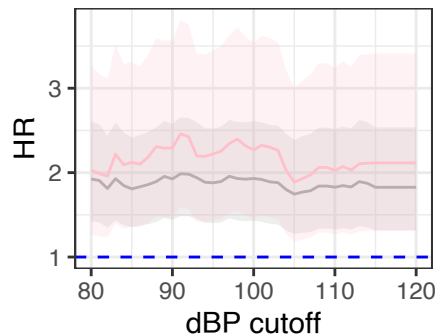

RERI

RERI

Multip. interaction

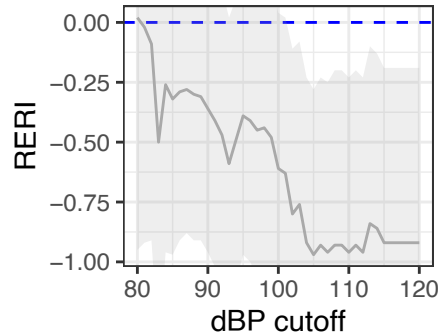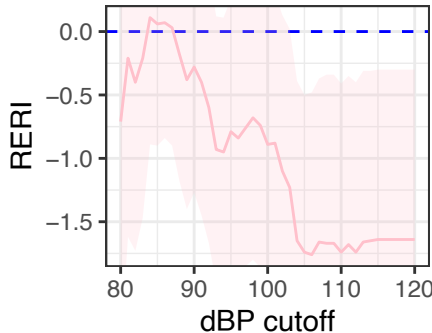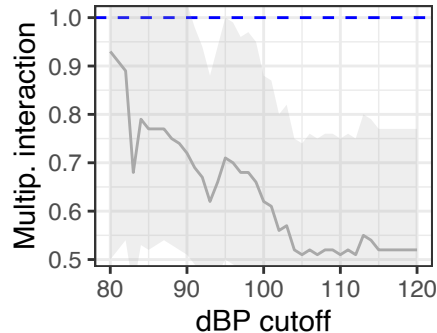

Multip. interaction

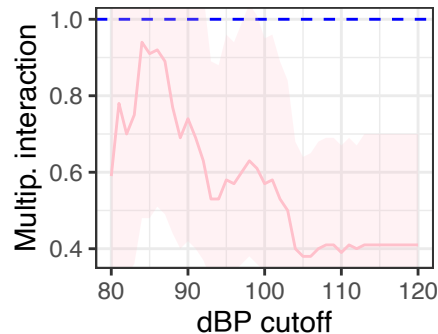

HTN, hypertension

BP, blood pressure

dBP, mean diastolic blood pressure at baseline

HR, hazard ratio in comparison to normal FLI, no hypertension

category in the fully-adjusted Cox regression models

Outcome — all-cause — CV mortality

# Defining HTN by pulse pressure cutoff or (self-reported HTN and medic)

normal FLI, HTN

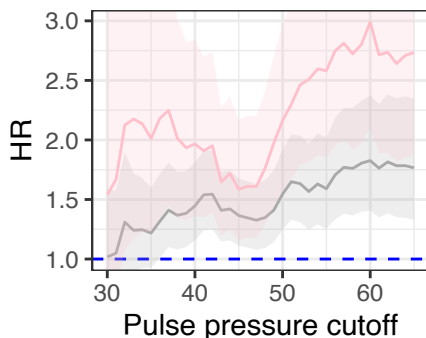

FLD, no HTN

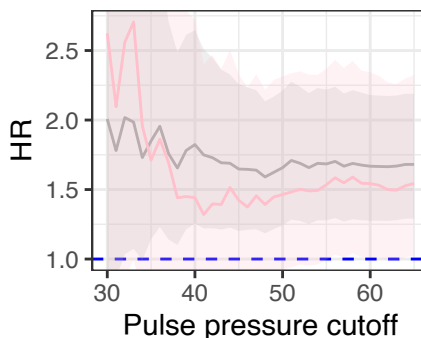

FLD, HTN

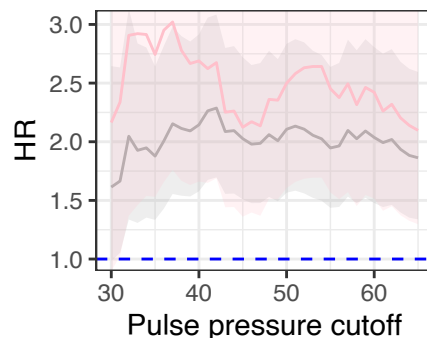

RERI

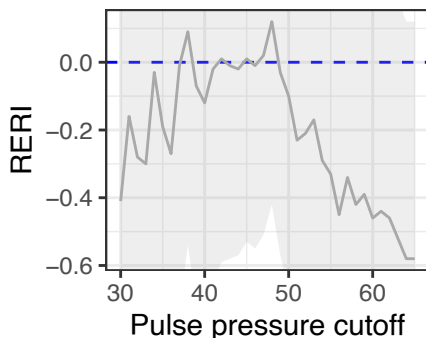

RERI

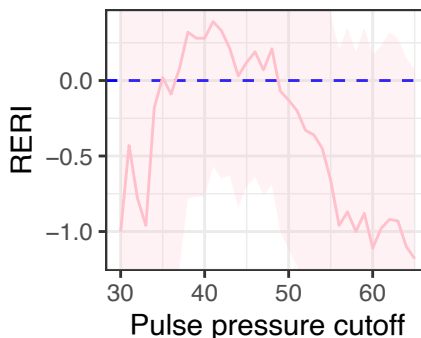

Multip. interaction

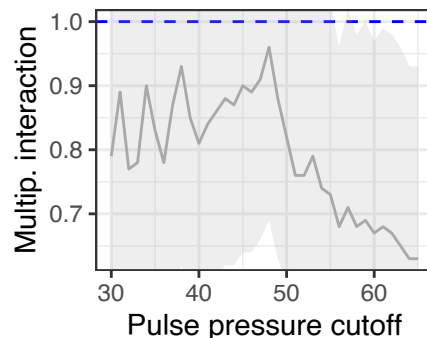

Multip. interaction

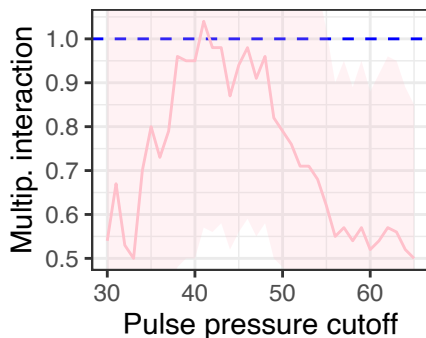

HTN, hypertension

HR, hazard ratio in comparison to normal FLI, no hypertension category in the fully-adjusted Cox regression models.

Outcome — all-cause — CV mortality
