# Supplementary material
Source: publisher figshare collection journal article supplement (https://tandf.figshare.com/articles/dataset/_/15127988)
Supplement: Supplementary file 1 [file 1]

**Supplementary material 1.** Hazard ratios (HRs) of covariates for mortality and cardiovascular outcomes in the study population (n=1569)

|  | Number of events (n) | Crude HR (95% CI) | Fully adjusted HR (95% CI) |  | Number of events (n) | Crude HR (95% CI) | Fully adjusted HR (95% CI) |
| --- | --- | --- | --- | --- | --- | --- | --- |
|  | **All-cause mortality** | | |  | **Cardiovascular mortality** | | |
|  |  | | |  |  | | |
| BMI (kg/m2) ≤ 25 (ref.) | 269 (511) | 1 | 1 |  | 105 (511) | 1 | 1 |
| (25, 27.5] | 289 (496) | 1.02 (0.86, 1.2) | 1.21 (0.82, 1.77) |  | 135 (496) | 1.21 (0.94, 1.56) | 1.88 (1.01, 3.51) |
| (27.5, 30] | 201 (310) | 1.17 (0.97, 1.4) | 1.43 (0.94, 2.19) |  | 84 (310) | 1.24 (0.93, 1.66) | 2.72 (1.39, 5.29) |
| (30, 32.5] | 107 (163) | 1.18 (0.95, 1.48) | 1.08 (0.64, 1.83) |  | 54 (163) | 1.51 (1.09, 2.1) | 2.03 (0.92, 4.50) |
| > 32.5 | 67 (89) | 1.77 (1.35, 2.31) | 2.18 (1.15, 4.14) |  | 34 (89) | 2.27 (1.54, 3.34) | 3.18 (1.15, 8.77) |
| Never smoker (ref.) | 201 (463) | 1 | 1 |  | 95 (463) | 1 | 1 |
| Previous smoker | 328 (558) | 1.44 (1.21, 1.72) | 1.67 (1.15, 2.42) |  | 141 (558) | 1.29 (0.99, 1.68) | 1.87 (0.98, 3.58) |
| Current smoker | 404 (548) | 2.73 (2.3, 3.24) | 4.05 (2.91, 5.61) |  | 176 (548) | 2.5 (1.94, 3.21) | 5.66 (3.21, 9.97) |
| Alcohol consumption in 100g/week | - | 1.17 (1.13, 1.22) | 1.10 (1.05, 1.15) |  | - | 1.18 (1.11, 1.24) | 1.11 (1.04, 1.18) |
|  | **Non-cardiovascular mortality** | | |  |  | | |
| BMI (kg/m2) ≤ 25 (ref.) | 164 (511) | 1 | 1 |  |  |  |  |
| (25, 27.5] | 154 (496) | 0.9 (0.72, 1.12) | 0.90 (0.55, 1.47) |  |  |  |  |
| (27.5, 30] | 117 (310) | 1.12 (0.88, 1.42) | 0.87 (0.49, 1.56) |  |  |  |  |
| (30, 32.5] | 53 (163) | 0.97 (0.71, 1.32) | 0.67 (0.32, 1.39) |  |  |  |  |
| > 32.5 | 33 (89) | 1.45 (0.99, 2.1) | 1.73 (0.75, 3.99) |  |  |  |  |
| Never smoker (ref.) | 106 (463) | 1 | 1 |  |  |  |  |
| Previous smoker | 187 (558) | 1.57 (1.24, 2) | 1.58 (1.01, 2.49) |  |  |  |  |
| Current smoker | 228 (548) | 2.94 (2.33, 3.71) | 3.31 (2.21, 4.97) |  |  |  |  |
| Alcohol consumption in 100g/week | - | 1.17 (1.1, 1.23) | 1.09 (1.02, 1.16) |  |  |  |  |
|  |  |  |  |  |  |  |  |
| CI, confidence interval; BMI, body mass index; ref., reference category.  Crude HRs are hazard ratios adjusted for age only. Fully adjusted HRs were adjusted for age, body mass index, smoking, the interaction between body mass index and smoking, and alcohol consumption. | | | | | | | |
